# Supplementary material
Source: PubMed Central journal article supplement (PMC3421760)
Supplement: JVI.00609-12_zjv999096315so1.pdf [file JVI.00609-12_zjv999096315so1.pdf]

1 **Legends for supplementary figures**

2 **Fig. S1.** HSV-1 infection induces the outgrowth of filopodia and lamellipodia during  
3 the early infection. (A) SK-N-SH cells were infected with HSV-1 (MOI=30) for 2 and  
4 4 h respectively, fixed, permeabilized and stained with TRITC-Phalloidin and DAPI.  
5 Images were then recorded by LSM. (B) Cells were infected with HSV-1 (MOI=5)  
6 for 1 h and treated for LSM detection.

7 **Fig. S2.** Cell viabilities at different time points post infection. SK-N-SH cells were  
8 infected with HSV-1 (MOI=5) for 2, 6, 12 and 20 h, respectively. Cell viabilities were  
9 then determined by MTT assay. Each value represents mean  $\pm$  s.d. of 3 separate  
10 experiments. (\*:  $p < 0.05$ ; \*\*:  $p < 0.01$ , compared with the samples at 0 h p.i.).

11 **Fig. S3.** Cytotoxicity of CytoD, Lat A and Jas on SK-N-SH cells. SK-N-SH cells  
12 grown in glass bottom dish were treated with different inhibitors at indicated  
13 concentrations for 5 h. One hour prior to fixation, cells were labeled with 10  $\mu\text{g/mL}$   
14 PI/PBS and then fixed with 4% paraformaldehyde/PBS for 15 min, and followed by  
15 counterstaining with 1 mg/mL DAPI/PBS. Images were then acquired by LSM.

16 **Fig. S4.** Effects of CytoD, Lat A and Jas on F-actin and microtubule networks of  
17 HSV-1 infected SK-N-SH cells. Cells were pretreated with CytoD (0.5  $\mu\text{g/mL}$ ), Lat A  
18 (0.5  $\mu\text{M}$ ) or Jas (0.5  $\mu\text{M}$ ) for 1 h and then infected with HSV-1 (MOI=30) for 4 h in  
19 the presence of inhibitors. The cells were then fixed and stained for LSM observation.

20 **Fig. S5.** Effects of CytoD, Lat A and Jas on F-actin and microtubule networks of  
21 normal SK-N-SH cells. Cells were treated with CytoD (0.5  $\mu\text{g/mL}$ ), Lat A (0.5  $\mu\text{M}$ )  
22 or Jas (0.5  $\mu\text{M}$ ) for 5 h and then fixed and stained for LSM observation.

23  
24  
25  
26

1 Fig. S1

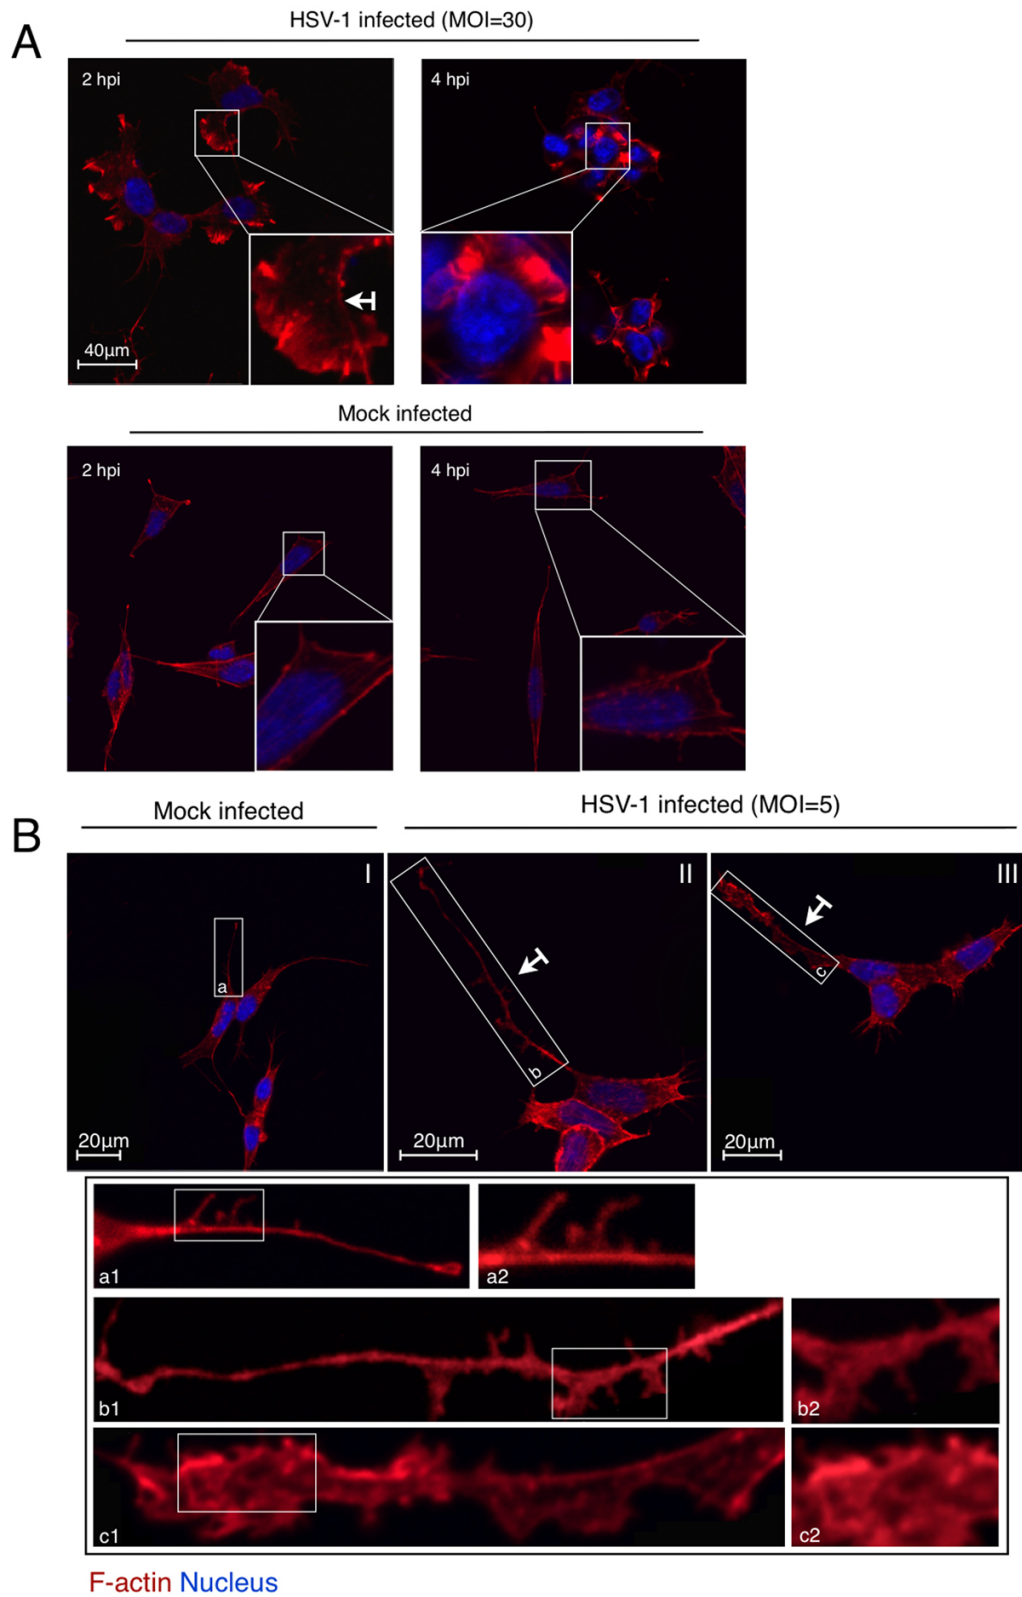

2  
3  
4  
5

1 Fig. S2

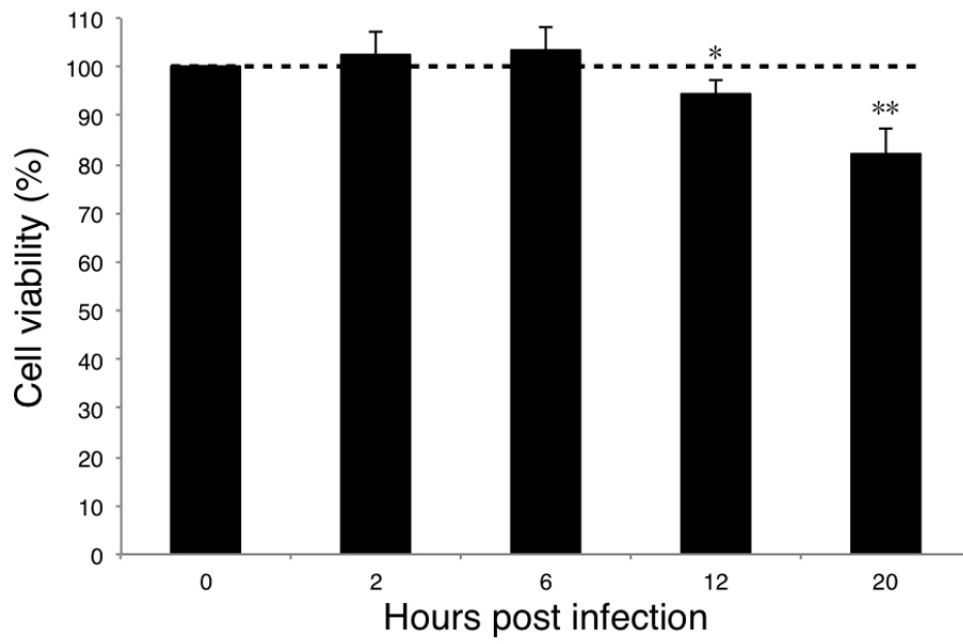

2  
3  
4  
5  
6  
7  
8  
9  
10  
11  
12  
13  
14  
15  
16  
17  
18  
19  
20  
21

1 Fig. S3

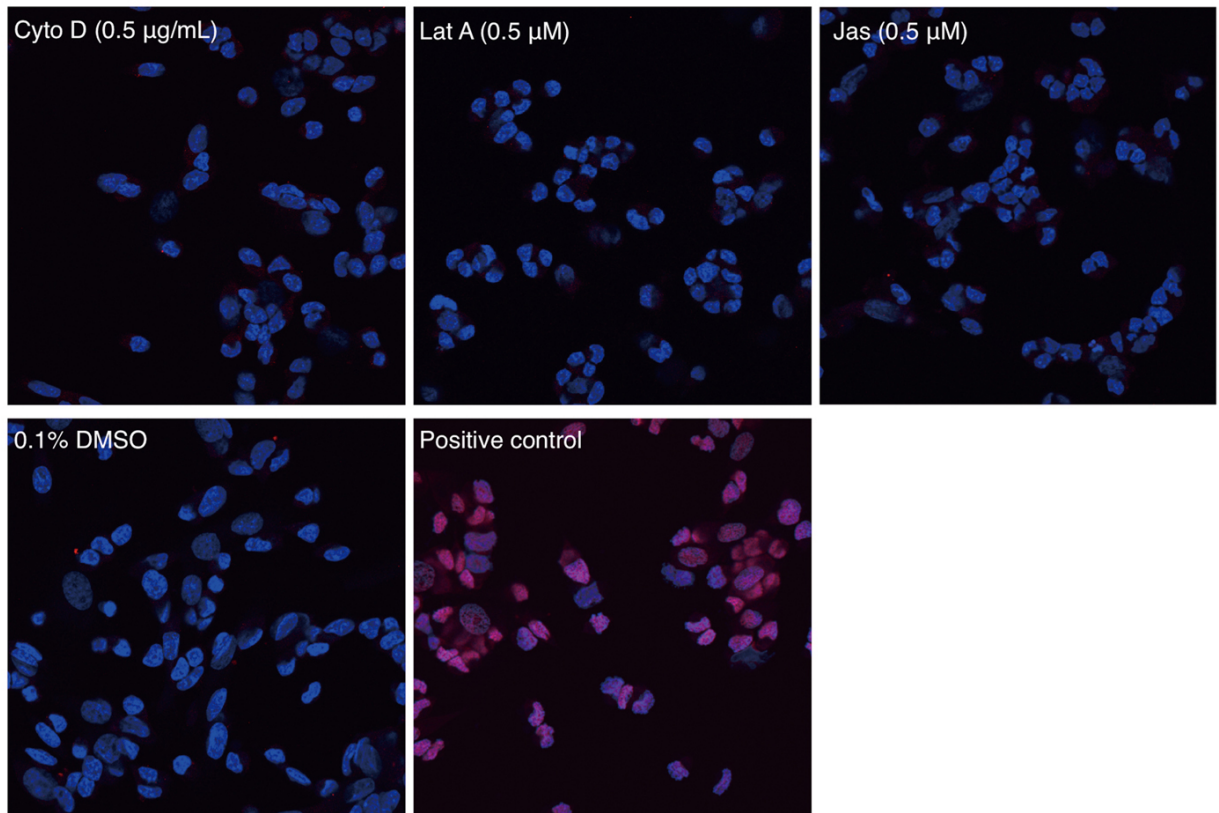

2  
3  
4  
5  
6  
7  
8  
9  
10  
11  
12  
13  
14  
15  
16  
17  
18  
19

1 Fig. S4

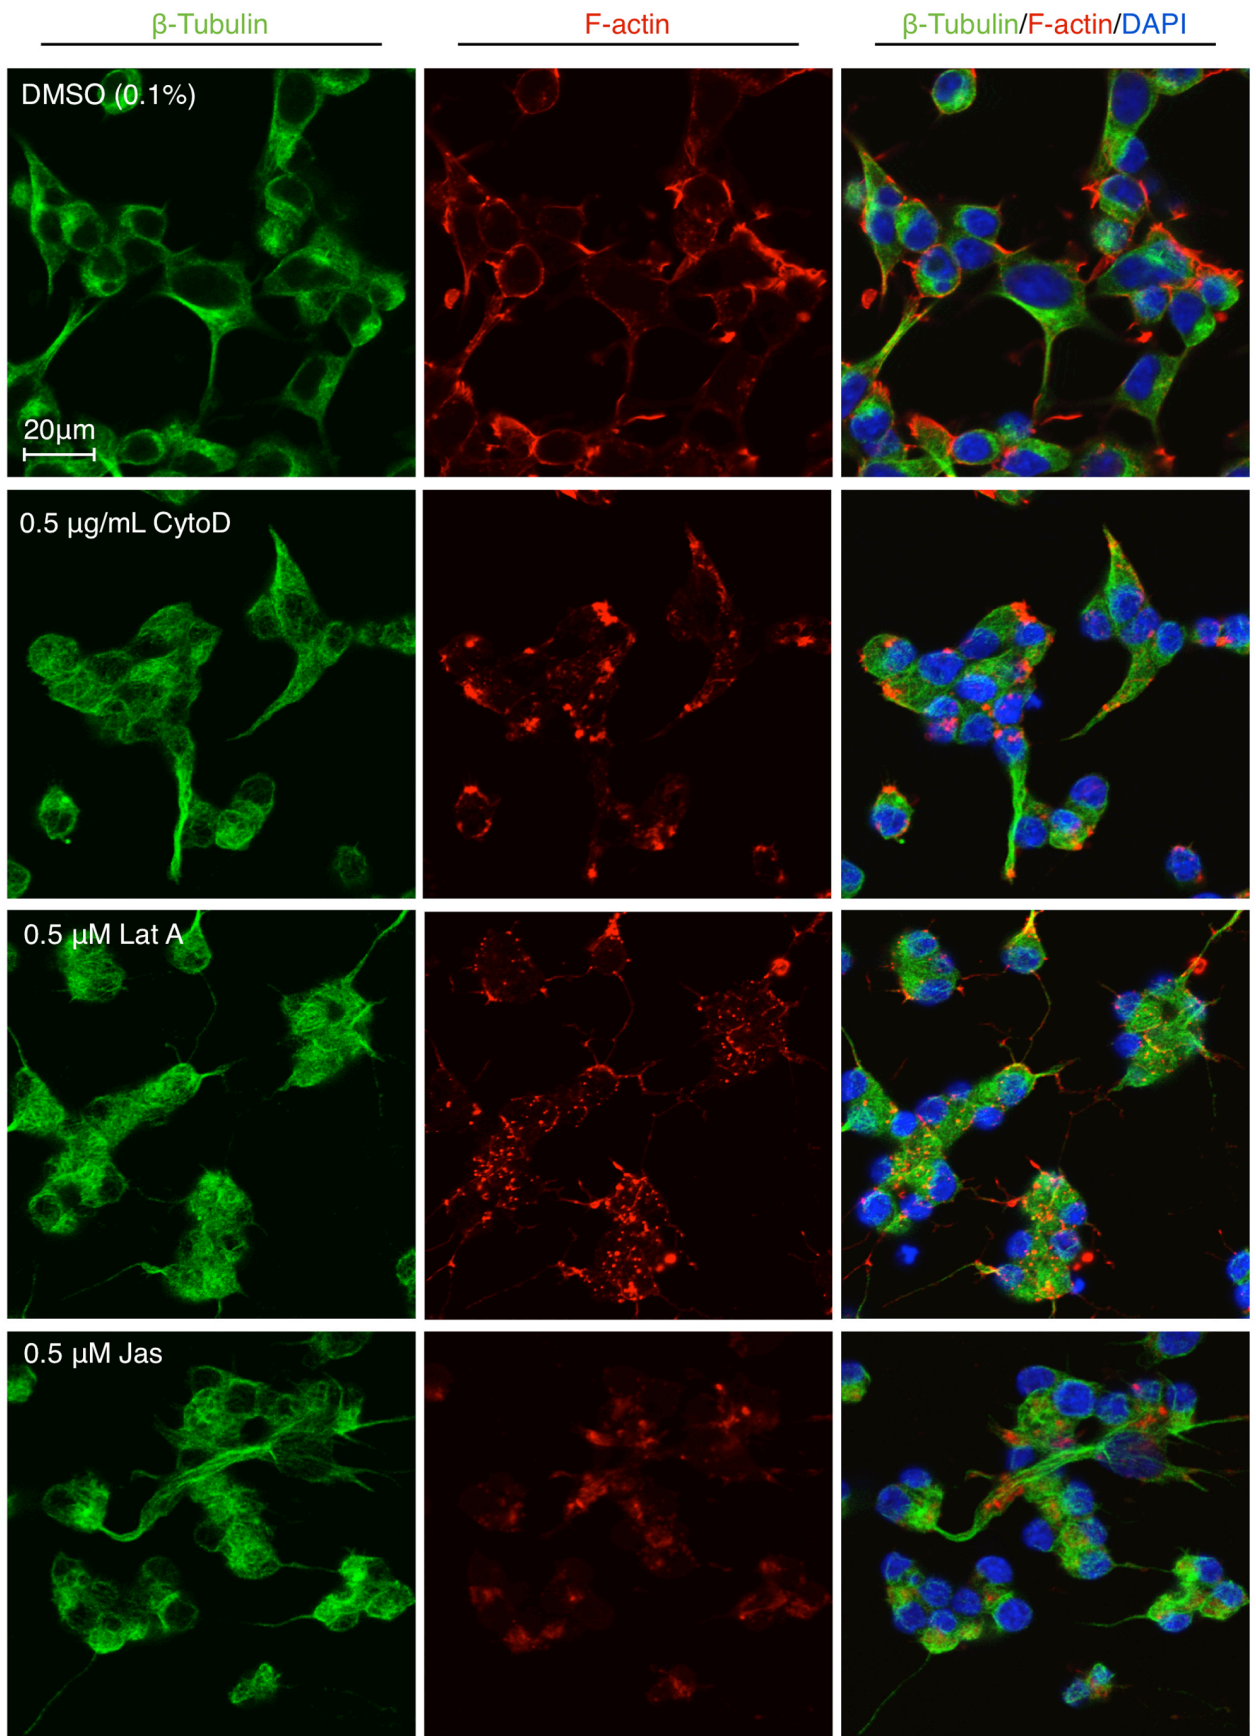

2

1 Fig. S5

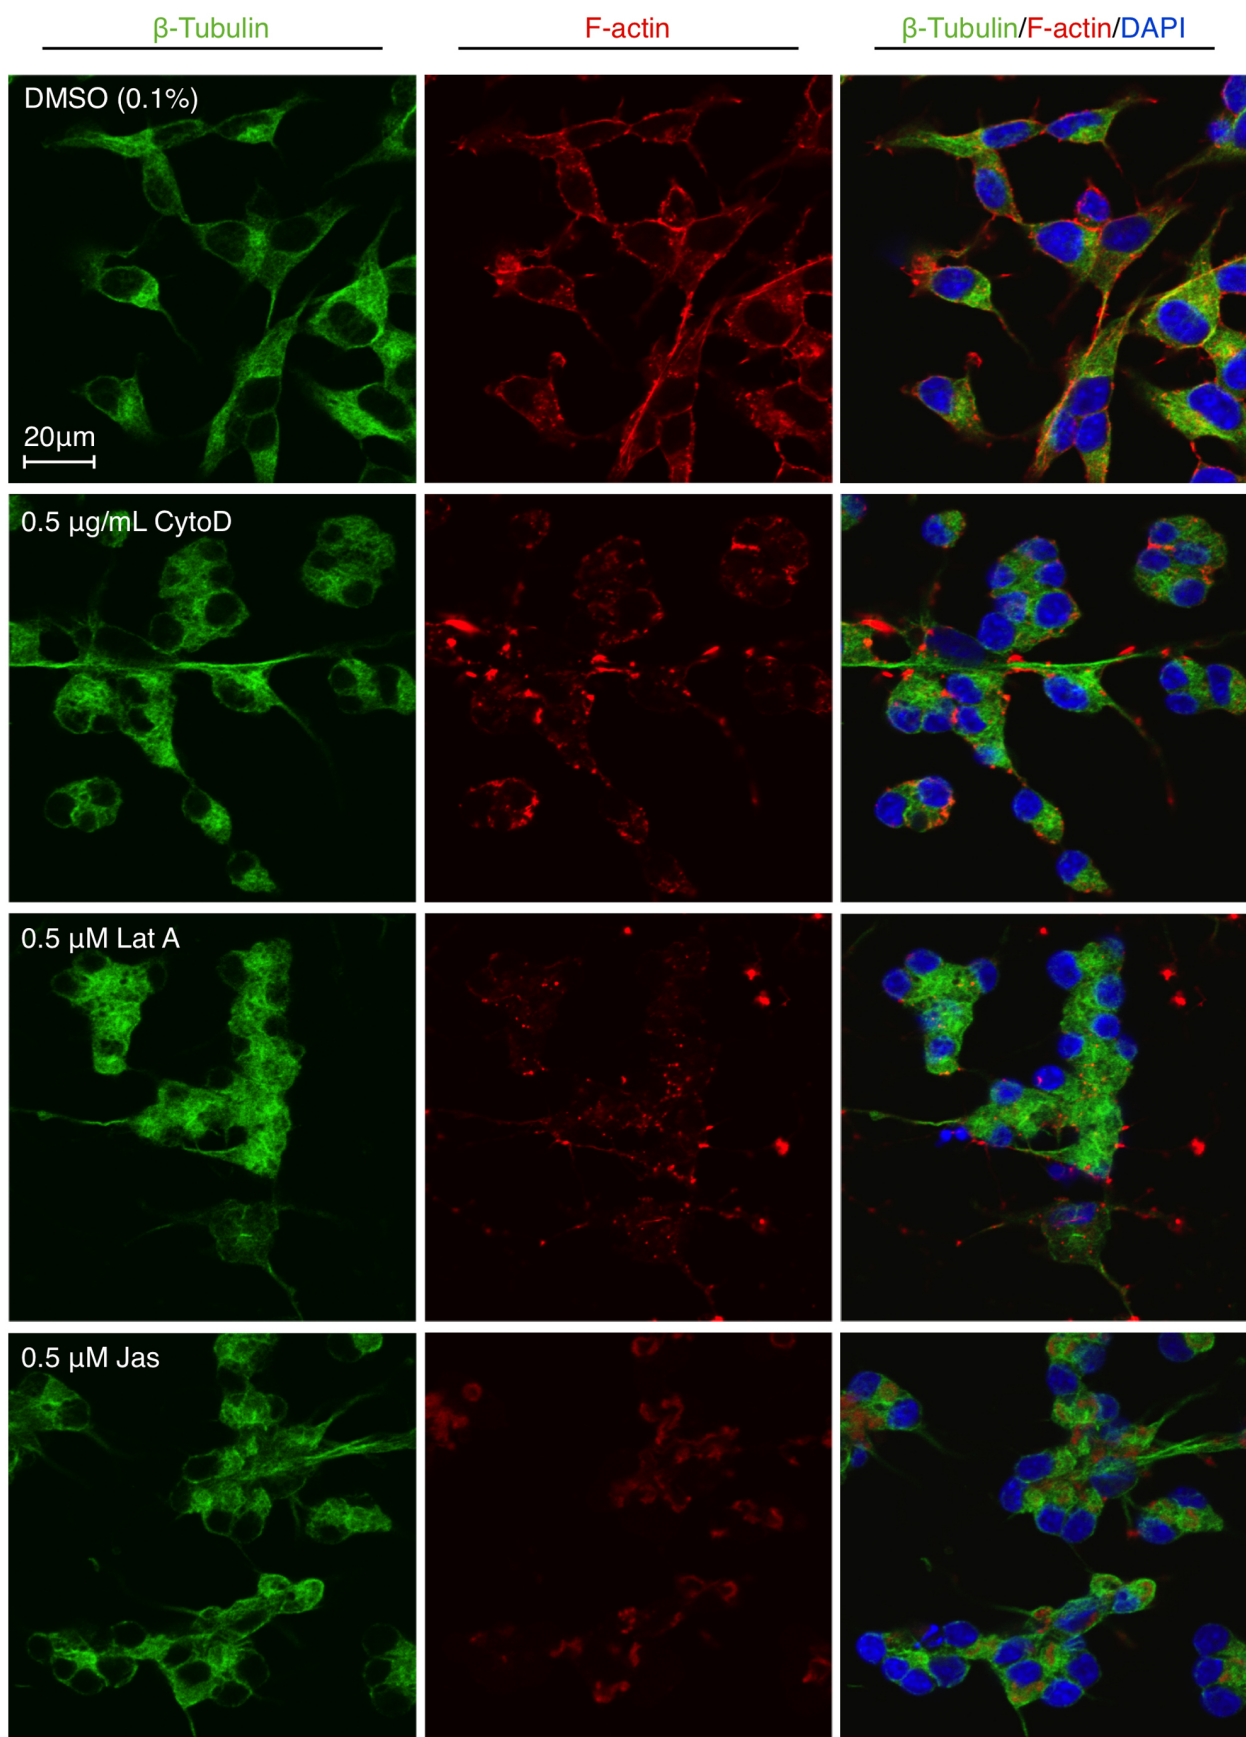

2
